# Supplementary material for: Self-Reported Dietary Management Behaviors and Dietary Intake among Chinese Adults with Diabetes: A Population-Based Study
Source: MDPI journal article supplement (doi:10.3390/nu14235178), 2022-12-05
Supplement: s1 [file s1]

## Supplementary material

### Self-reported dietary management behaviors and dietary intake among Chinese adults with diabetes: a population-based study

Yixu Liu <sup>1,†</sup>, Dongmei Yu <sup>2,†</sup>, Jiayou Luo <sup>1</sup>, Shuya Cai <sup>2</sup>, Ping Ye <sup>3</sup>, Zhenzhen Yao <sup>1</sup>, Miyang Luo <sup>1,\*</sup> and Liyun Zhao <sup>2,\*</sup>

<sup>1</sup> Xiangya School of Public Health, Central South University, Changsha 410008, China

<sup>2</sup> Key Laboratory of Trace Element Nutrition of National Health Commission, Chinese Center for Disease Control and Prevention, National Institute for Nutrition and Health, Beijing 100050, China

<sup>3</sup> Yuxi Center for Disease Control and Prevention, Yuxi 653100, China

\* Correspondence: miyangluo@csu.edu.cn; zhaoly@ninh.chinacdc.cn

<sup>†</sup> These authors contributed equally to this work.

#### Contents

**Table S1.** CHDI components and criteria for scoring.

**Table S2.** Characteristics of adults with diabetes across the three rounds of China National Nutrition Surveys.

**Table S3.** CHDI score of adults with diabetes in the three rounds of China National Nutrition Surveys.

**Table S1.** CHDI components and criteria for scoring [1].

| CHDI Component                   | Score Range | Standard for Maximum Score | Standard for Minimum Score of Zero |
|----------------------------------|-------------|----------------------------|------------------------------------|
| Food variety                     | 0–10        | ≥12 kind                   | ≤5 kind                            |
| Refined grains                   | 0–5         | ≥100 g/1000kcal            | 0                                  |
| Whole grain, dry bean, and tuber | 0–5         | ≥40 g/1000kcal             | 0                                  |
| Total vegetables                 | 0–5         | ≥180 g/1000kcal            | 0                                  |
| Dark green and orange vegetables | 0–5         | ≥90 g/1000kcal             | 0                                  |
| Fruit                            | 0–10        | ≥110 g/1000kcal            | 0                                  |
| Dairy                            | 0–10        | ≥100 g/1000kcal            | 0                                  |
| Soybean                          | 0–10        | ≥10 g/1000kcal             | 0                                  |
| Meat and egg                     | 0–5         | ≥50 g/1000kcal             | 0                                  |
| Fish, shellfish and mollusk      | 0–5         | ≥30 g/1000kcal             | 0                                  |
| Calories from SFAs               | 0–10        | <10%                       | ≥15%                               |
| Sodium                           | 0–10        | ≤1 g/1000kcal              | ≥4 g/1000kcal                      |
| Empty calories                   | 0–10        | ≤20%                       | ≥40%                               |

Abbreviations: CHDI, China Healthy Diet Index; SFAs, saturated fatty acids.

**Table S2.** Characteristics of adults with diabetes across the three rounds of China National Nutrition Surveys.

| Variable                             | 2002<br>( <i>n</i> =663) | 2012<br>( <i>n</i> =2420) | 2015<br>( <i>n</i> =3146) |
|--------------------------------------|--------------------------|---------------------------|---------------------------|
| Gender                               |                          |                           |                           |
| Male                                 | 297 (48.5)               | 1093 (49.7)               | 1411 (47.8)               |
| Female                               | 366 (51.5)               | 1327 (50.3)               | 1735 (52.2)               |
| Age group (years)                    |                          |                           |                           |
| 18-39                                | 33 (6.3)                 | 66 (7.2)                  | 51 (5.4)                  |
| 40-64                                | 424 (66.6)               | 1407 (60.7)               | 1850 (60.2)               |
| ≥65                                  | 206 (27.1)               | 947 (32.1)                | 1245 (34.4)               |
| Area                                 |                          |                           |                           |
| Urban                                | 467 (77.6)               | 1775 (68.5)               | 1891 (65.9)               |
| Rural                                | 196 (22.4)               | 645 (31.5)                | 1255 (34.1)               |
| Annual income per capita             |                          |                           |                           |
| Very low                             | 60 (9.4)                 | 429 (20.2)                | 600 (18.4)                |
| Low                                  | 103 (14.7)               | 399 (18.8)                | 648 (19.8)                |
| Middle                               | 169 (25.9)               | 473 (20.0)                | 615 (19.6)                |
| High                                 | 189 (30.2)               | 328 (13.5)                | 644 (21.5)                |
| Very high                            | 122 (19.8)               | 637 (27.5)                | 639 (20.7)                |
| Education level                      |                          |                           |                           |
| Under primary                        | 68 (9.3)                 | 324 (12.6)                | 520 (14.5)                |
| Primary school                       | 210 (28.1)               | 699 (26.9)                | 420 (11.6)                |
| Junior high school                   | 197 (30.9)               | 749 (30.9)                | 628 (18.7)                |
| Senior high school                   | 131 (21.7)               | 435 (19.6)                | 897 (29.4)                |
| Junior college and above             | 57 (10.0)                | 213 (10.0)                | 681 (25.8)                |
| Marital status                       |                          |                           |                           |
| Single                               | 9 (2.2)                  | 12 (1.1)                  | 15 (1.1)                  |
| Married/Cohabiting                   | 584 (87.9)               | 2087 (86.7)               | 2900 (91.4)               |
| Widowed/Divorced/Separated           | 69 (9.9)                 | 321 (12.2)                | 231 (7.5)                 |
| Body mass index (kg/m <sup>2</sup> ) |                          |                           |                           |
| <18.5                                | 14 (1.9)                 | 41 (2.2)                  | 40 (1.3)                  |
| 18.5-23.9                            | 225 (34.6)               | 767 (34.3)                | 933 (29.1)                |
| 24-27.9                              | 273 (41.9)               | 970 (43.3)                | 1364 (43.1)               |
| ≥28                                  | 148 (21.6)               | 440 (20.2)                | 809 (26.5)                |
| Dietary management behavior          |                          |                           |                           |
| Yes                                  | 536 (80.9)               | 1915 (78.0)               | 2406 (76.3)               |
| No                                   | 127 (19.1)               | 505 (22.0)                | 740 (23.7)                |

Data are *n* (weighted%). Number missing: Body mass index (*n*=205), Marital status (*n*=1), Annual income per capita (*n*=174).

**Table S3.** CHDI score of adults with diabetes in the three rounds of China National Nutrition Surveys.

| Variable         | weighted mean $\pm$ SD  |                        | <i>p</i> |
|------------------|-------------------------|------------------------|----------|
|                  | Dietary management: yes | Dietary management: no |          |
| All              | 56.3 $\pm$ 12.7         | 54.1 $\pm$ 12.3        | <0.001   |
| Year             |                         |                        |          |
| 2002             | 57.5 $\pm$ 12.1         | 53.9 $\pm$ 11.0        | 0.001    |
| 2012             | 56.1 $\pm$ 12.5         | 53.7 $\pm$ 12.0        | 0.004    |
| 2015             | 56.0 $\pm$ 13.1         | 54.6 $\pm$ 13.1        | 0.104    |
| Gender           |                         |                        |          |
| Male             | 57.0 $\pm$ 12.3 *       | 54.8 $\pm$ 12.1        | 0.001    |
| Female           | 55.7 $\pm$ 13.0 *       | 53.4 $\pm$ 12.6        | 0.003    |
| Age group, years |                         |                        |          |
| 18-39            | 55.9 $\pm$ 11.5 **      | 53.0 $\pm$ 13.0 *      | 0.128    |
| 40-64            | 55.5 $\pm$ 12.5 **      | 53.4 $\pm$ 11.6 *      | 0.001    |
| $\geq 65$        | 58.0 $\pm$ 13.1 **      | 55.9 $\pm$ 13.6 *      | 0.038    |
| Area             |                         |                        |          |
| Urban            | 58.5 $\pm$ 12.8 **      | 57.0 $\pm$ 12.1 **     | 0.023    |
| Rural            | 51.0 $\pm$ 10.6 **      | 49.4 $\pm$ 11.2 **     | 0.034    |

Data were adjusted for China National Nutrition Surveys weights to be nationally representative. Comparison of CHDI scores within each subgroup was conducted using the *t*-test or ANOVA, \*  $p < 0.05$ , \*\*  $p < 0.001$ . Comparison of the score between diabetic patients with and without dietary management was conducted using the *t*-test. Abbreviations: CHDI, China Healthy Diet Index; SD, standard deviation.

## References

1. He, Y.; Fang, Y.; Yang, X. Establishment and application of China healthy diet index. *Acta Nutrimenta Sinica* **2017**, *39*, 436-441. <https://doi.org/10.13325/j.cnki.acta.nutr.sin.2017.05.011>.
